# Supplementary material for: Anti-Tumor Efficiency of Perillylalcohol/β-Cyclodextrin Inclusion Complexes in a Sarcoma S180-Induced Mice Model
Source: PubMed Central journal article supplement (PMC7916601; doi:10.3390/pharmaceutics13020245), 2021-02-10
Supplement: pharmaceutics-13-00245-s001.pdf [file pharmaceutics-13-00245-s001.pdf]

Supplementary Material

# Anti-Tumour Efficiency of Perillyl alcohol/ $\beta$ -Cyclodextrin Inclusion Complexes in a Sarcoma S180-Induced Mice Model

Allan A. Rezende, Rafael S. Santos, Luciana N. Andrade, Ricardo G. Amaral, Matheus Pereira, *Cristiane Bani*, Mo Chen, Ronny Prierer, Classius F. da Silva, Ricardo L. C. de Albuquerque Junior, Eliana B. Souto<sup>8</sup>, Patrícia Severino

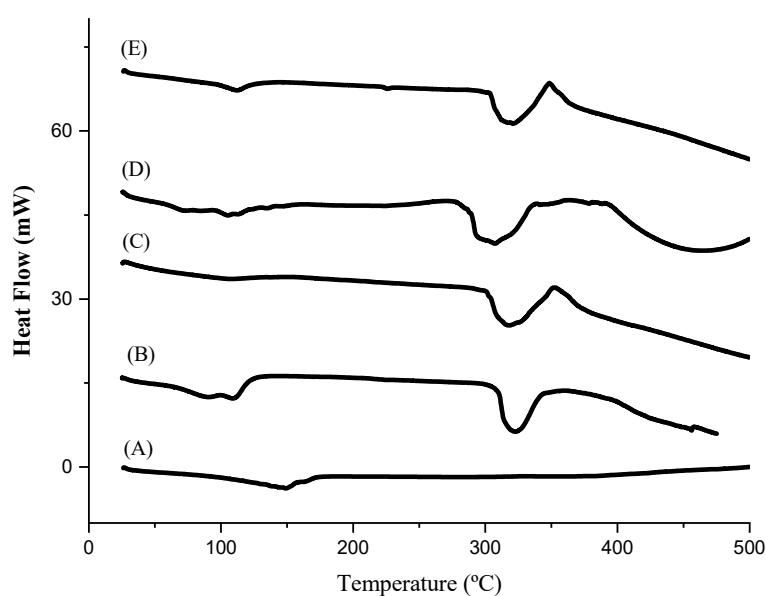

**Figure S1.** DSC thermogram (A) Perillyl alcohol, (B)  $\beta$ -cyclodextrin, (C) Co-evaporation, (D) Malaxation and (E) Physical mixture.

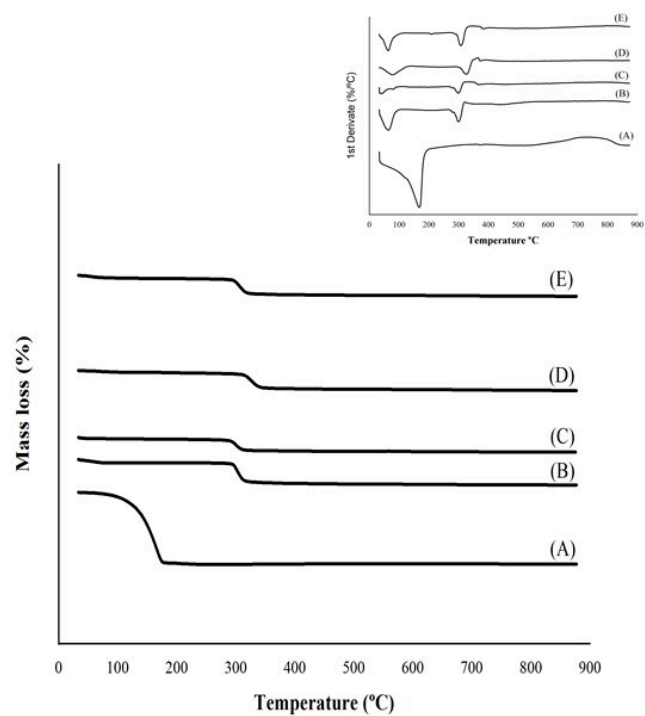

**Figure S2.** TG/DTGG curves of (A) Perillyl alcohol, (B)  $\beta$ -cyclodextrin, (C) Co-evaporation, (D) Malaxation and (E) Physical mixture.
